# Supplementary material
Source: Elsevier journal article supplement (https://www.sciencedirect.com/science/article/pii/S0300893220305455)
Supplement: mmc2 [file S0300893220305455:mmc2.xls]

## Sheet: Catheter Ablation
Keywords	Trabajos		Keyword 1	Keyword 2	Colaboración
catheter ablation	228		atrial fibrillation	catheter ablation	79
atrial fibrillation	157		ablation	atrial fibrillation	40
Ablation	102		Arrhythmia	Catheter ablation	31
radiofrequency catheter ablation	102		Catheter ablation	Electrophysiology	31
atrial flutter	56		catheter ablation	radiofrequency catheter ablation	31
Ventricular tachycardia	52		Catheter ablation	Ventricular tachycardia	31
Electrophysiology	51		Atrial flutter	Catheter ablation	27
Arrhythmia	45		Arrhythmia	Electrophysiology	23
accessory pathway	25		Catheter ablation	Registry	23
Cardiac magnetic resonance imaging	25		ablation	radiofrequency catheter ablation	21
Registry	24		ablation	atrial flutter	17
Tachycardia	21		Atrial fibrillation	Stroke	17
pulmonary veins	18		Electrophysiology	Registry	17
Wolff-Parkinson-White syndrome	18		atrial fibrillation	radiofrequency catheter ablation	16
Mapping	17		atrial fibrillation	pulmonary veins	15
Stroke	17		Catheter ablation	Tachycardia	15
supraventricular tachycardia	17		atrial fibrillation	Cardiac magnetic resonance imaging	14
Atrial tachycardia	16		Ablation	Catheter ablation	13
Implantable cardioverter-defibrillator	14		Ablation	Electrophysiology	13
Cardiac resynchronization therapy	13		Arrhythmia	Registry	13
Heart failure	13		Atrial fibrillation	Atrial flutter	13
Pulmonary vein isolation	13		atrial flutter	radiofrequency catheter ablation	13
Antiarrhythmic drugs	12		cardiac magnetic resonance imaging	catheter ablation	13
Anticoagulation	12		Anticoagulation	Atrial fibrillation	12
Cavotricuspid isthmus ablation	11		Atrial tachycardia	Catheter ablation	12
atrioventricular node	10		Catheter ablation	Stroke	12
Atrial fibrillation ablation	9		Ablation	Arrhythmia	11
Atrium	9		Accessory pathway	Catheter ablation	11
Echocardiography	9		atrial flutter	Cavotricuspid isthmus ablation	11
Complications	8		Accessory pathway	radiofrequency catheter ablation	10
Cryoablation	8		Arrhythmia	Atrial fibrillation	9
electrocardiography	8		Atrial fibrillation	Electrophysiology	9
Statistics	8		Atrial fibrillation	Pulmonary vein isolation	9
Surgical ablation	8		Atrial flutter	Atrial tachycardia	9
Anatomy	7		catheter ablation	Wolff-Parkinson-White syndrome	9
atrioventricular nodal reentrant tachycardia	7		radiofrequency catheter ablation	ventricular tachycardia	9
Computer model	7		Antiarrhythmic drugs	Atrial fibrillation	8
Congenital heart disease	7		Anticoagulation	Catheter ablation	8
cryoballoon	7		Anticoagulation	Stroke	8
electroanatomical mapping	7		Atrial fibrillation	Atrial tachycardia	8
entrainment	7		Atrial fibrillation	Surgical ablation	8
Fluoroscopy	7		Catheter ablation	Heart failure	8
myocardial infarction	7		Catheter ablation	Implantable cardioverter-defibrillator	8
Outcomes	7		catheter ablation	mapping	8
Rhythm control	7		Catheter ablation	Statistics	8
ventricular fibrillation	7		catheter ablation	supraventricular tachycardia	8
atrial mapping	6		Electrophysiology	Statistics	8
atrial reentry	6		Registry	Statistics	8
Atrioventricular block	6		Ablation	Atrial tachycardia	7
Pacemaker	6		Ablation	Stroke	7
Rate control	6		Antiarrhythmic drugs	Catheter ablation	7
adenosine	5		Atrial fibrillation	Cardiac resynchronization therapy	7
Atrioventricular junction ablation	5		atrial fibrillation	cryoballoon	7
Brugada syndrome	5		Atrial fibrillation	Heart failure	7
bundle branch block	5		Atrial fibrillation	Rhythm control	7
Epicardial ablation	5		Atrial flutter	Stroke	7
esophagus	5		catheter ablation	pulmonary vein isolation	7
Imaging	5		Catheter ablation	Surgical ablation	7
pediatrics	5		Computer model	radiofrequency catheter ablation	7
Preexcitation syndrome	5		Ablation	Anticoagulation	6
remodeling	5		Arrhythmia	Atrial flutter	6
Sudden cardiac death	5		Arrhythmia	Stroke	6
Bleeding	4		Atrial fibrillation	Outcomes	6
Catheters	4		Atrial fibrillation	Rate control	6
Complete AV block	4		catheter ablation	cryoballoon	6
EHRA survey	4		Catheter ablation	Myocardial infarction	6
EP wire	4		electrophysiology	tachycardia	6
His bundle	4		radiofrequency catheter ablation	supraventricular tachycardia	6
incremental pacing	4		ablation	atrium	5
ischemic cardiomyopathy	4		Ablation	Cavotricuspid isthmus ablation	5
late gadolinium enhancement	4		Ablation	Mapping	5
left atrium	4		Ablation	pulmonary veins	5
Nonischemic cardiomyopathy	4		Ablation	Surgical ablation	5
Pacing	4		ablation	ventricular tachycardia	5
Predictors	4		accessory pathway	Wolff-Parkinson-White syndrome	5
Premature ventricular complex	4		Anticoagulation	Arrhythmia	5
sudden death	4		Anticoagulation	Atrial flutter	5
Survey	4		Anticoagulation	Atrial tachycardia	5
thromboembolism	4		Anticoagulation	Surgical ablation	5
Ventricular tachycardia ablation	4		Arrhythmia	Atrial tachycardia	5
anticoagulants	3		Arrhythmia	Implantable cardioverter-defibrillator	5
atrial fibrosis	3		arrhythmia	radiofrequency catheter ablation	5
cardiac electrophysiology	3		Arrhythmia	Surgical ablation	5
Cardiomyopathy	3		Atrial fibrillation	Registry	5
catheter	3		atrial fibrillation	remodeling	5
Children	3		atrial flutter	atrial reentry	5
Clinical trial	3		Atrial flutter	Surgical ablation	5
Computed tomography	3		atrial reentry	radiofrequency catheter ablation	5
Conducting channels	3		Atrial tachycardia	Stroke	5
conduction	3		Atrial tachycardia	Surgical ablation	5
Coronary artery disease	3		Atrioventricular node	Catheter ablation	5
endocardium	3		Atrium	Catheter ablation	5
epicardium	3		Cardiac magnetic resonance imaging	Ventricular tachycardia	5
flutter ablation	3		Catheter ablation	Pulmonary veins	5
Follow-up	3		Electrophysiology	Implantable cardioverter-defibrillator	5
Fourier analysis	3		Rate control	Rhythm control	5
genetics	3		Stroke	Surgical ablation	5
Guidelines	3		ablation	Computer model	4
Left atrial appendage closure	3		Ablation	Congenital heart disease	4
Management	3		ablation	tachycardia	4
Navigation system	3		Antiarrhythmic drugs	Arrhythmia	4
Oral anticoagulation	3		Anticoagulation	Rate control	4
Permanent junctional reciprocating tachycardia	3		Anticoagulation	Rhythm control	4
Quality of life	3		Atrial fibrillation	Bleeding	4
radiation exposure	3		Atrial fibrillation	Cavotricuspid isthmus ablation	4
rotors	3		Atrial fibrillation	Imaging	4
Sinoatrial node	3		Atrial fibrillation	Implantable cardioverter-defibrillator	4
Superior vena cava	3		atrial fibrillation	late gadolinium enhancement	4
surgery	3		Atrial fibrillation	Survey	4
Syncope	3		atrial fibrillation	thromboembolism	4
tachyarrhythmias	3		atrial flutter	incremental pacing	4
Triangle of Koch	3		atrial tachycardia	Radiofrequency catheter ablation	4
Ventricular arrhythmias	3		atrioventricular nodal reentrant tachycardia	catheter ablation	4
			cardiac magnetic resonance imaging	late gadolinium enhancement	4
			Cardiac magnetic resonance imaging	pulmonary veins	4
			Cardiac magnetic resonance imaging	remodeling	4
			Cardiac resynchronization therapy	Catheter ablation	4
			Cardiac resynchronization therapy	Heart failure	4
			Cardiac resynchronization therapy	Pacemaker	4
			Catheter ablation	Cryoablation	4
			Catheter ablation	Echocardiography	4
			Catheter ablation	Fluoroscopy	4
			catheter ablation	late gadolinium enhancement	4
			catheter ablation	pediatrics	4
			Catheter ablation	Survey	4
			Cryoablation	radiofrequency catheter ablation	4
			EHRA survey	EP wire	4
			electrophysiology	Radiofrequency catheter ablation	4
			esophagus	Radiofrequency catheter ablation	4
			Implantable cardioverter-defibrillator	Pacemaker	4
			ischemic cardiomyopathy	ventricular tachycardia	4
			Myocardial infarction	Ventricular tachycardia	4
			Nonischemic cardiomyopathy	Ventricular tachycardia	4
			pediatrics	tachycardia	4
			Radiofrequency catheter ablation	Wolff-Parkinson-White syndrome	4
			ablation	accessory pathway	3
			ablation	anatomy	3
			ablation	atrioventricular node	3
			ablation	Bundle branch block	3
			ablation	Cardiac magnetic resonance imaging	3
			ablation	catheters	3
			Ablation	Complete AV block	3
			Ablation	Complications	3
			Ablation	Echocardiography	3
			ablation	fluoroscopy	3
			Ablation	Imaging	3
			Ablation	Incremental pacing	3
			ablation	Wolff-Parkinson-White syndrome	3
			accessory pathway	supraventricular tachycardia	3
			Adenosine	Catheter ablation	3
			adenosine	electrophysiology	3
			anatomy	mapping	3
			Antiarrhythmic drugs	Electrophysiology	3
			Antiarrhythmic drugs	Rate control	3
			Antiarrhythmic drugs	stroke	3
			anticoagulants	Atrial Fibrillation	3
			anticoagulants	catheter ablation	3
			Anticoagulation	Bleeding	3
			Arrhythmia	atrium	3
			Arrhythmia	Congenital heart disease	3
			Arrhythmia	Statistics	3
			arrhythmia	Ventricular tachycardia	3
			atrial fibrillation	catheter	3
			atrial fibrillation	echocardiography	3
			Atrial fibrillation	EHRA survey	3
			Atrial fibrillation	electrocardiography	3
			Atrial fibrillation	EP wire	3
			Atrial fibrillation	Management	3
			Atrial fibrillation	Mapping	3
			Atrial fibrillation	Oral anticoagulation	3
			Atrial fibrillation	Predictors	3
			atrial fibrillation	rotors	3
			atrial fibrillation	surgery	3
			Atrial fibrillation ablation	Pulmonary vein isolation	3
			atrial fibrosis	Cardiac magnetic resonance imaging	3
			atrial flutter	atrial mapping	3
			atrial flutter	Complete AV block	3
			atrial flutter	congenital heart disease	3
			atrial flutter	electrophysiology	3
			atrial flutter	flutter ablation	3
			atrial reentry	flutter ablation	3
			Atrioventricular junction ablation	Cardiac resynchronization therapy	3
			Bleeding	Stroke	3
			Brugada syndrome	catheter ablation	3
			Bundle branch block	electrophysiology	3
			Bundle branch block	tachycardia	3
			cardiac electrophysiology	radiofrequency catheter ablation	3
			Cardiac resynchronization therapy	Implantable cardioverter-defibrillator	3
			Catheter ablation	Catheters	3
			Catheter ablation	Complications	3
			catheter ablation	electroanatomical mapping	3
			catheter ablation	His bundle	3
			catheter ablation	ischemic cardiomyopathy	3
			Catheter ablation	Nonischemic cardiomyopathy	3
			Catheter ablation	Outcomes	3
			Catheter ablation	Pacemaker	3
			Catheter ablation	Rate control	3
			Catheter ablation	Remodeling	3
			catheter ablation	thromboembolism	3
			catheter ablation	ventricular fibrillation	3
			Cavotricuspid isthmus ablation	Complete AV block	3
			Cavotricuspid isthmus ablation	Incremental pacing	3
			Complete AV block	Incremental pacing	3
			Complications	radiofrequency catheter ablation	3
			electroanatomical mapping	ventricular tachycardia	3
			Electrophysiology	Imaging	3
			entrainment	tachycardia	3
			Epicardial ablation	Ventricular tachycardia	3
			fluoroscopy	radiation exposure	3
			flutter ablation	radiofrequency catheter ablation	3
			Implantable cardioverter-defibrillator	ventricular tachycardia	3
			Mapping	Radiofrequency catheter ablation	3
			Outcomes	Rate control	3
			pediatrics	radiofrequency catheter ablation	3
			pulmonary veins	Radiofrequency catheter ablation	3
			radiofrequency catheter ablation	tachycardia	3
			stroke	thromboembolism	3
			ventricular fibrillation	Ventricular tachycardia	3

## Sheet: CRT
Keywords	Trabajos		Keyword 1	Keyword 2	Colaboración
Cardiac resynchronization therapy	175		Cardiac resynchronization therapy	Heart failure	76
Heart failure	104		Cardiac resynchronization therapy	implantable cardioverter defibrillator	27
Pacemakers	58		Cardiac resynchronization therapy	Pacemakers	19
implantable cardioverter defibrillator	35		biventricular pacing	Cardiac resynchronization therapy	17
Biventricular pacing	34		cardiac resynchronization therapy	echocardiography	17
Registry	28		Biventricular pacing	Heart failure	15
Cardiac pacing	26		Echocardiography	Heart failure	15
Echocardiography	25		Cardiac pacing	Cardiac resynchronization therapy	14
Arrhythmia	19		arrhythmia	Defibrillator	13
Defibrillator	18		Heart failure	implantable cardioverter defibrillator	13
Atrial fibrillation	16		Pacemakers	Registry	13
Electrophysiology	11		arrhythmia	Registry	12
Left bundle branch block	10		Atrial fibrillation	Cardiac resynchronization therapy	12
Remote monitoring	9		Defibrillator	Registry	12
Reverse remodeling	9		Biventricular pacing	Pacemakers	11
Dyssynchrony	8		Heart failure	Pacemakers	10
Cardiac magnetic resonance	7		implantable cardioverter defibrillator	Pacemakers	9
Cardiomyopathy	7		Biventricular pacing	Registry	8
Catheter ablation	7		Cardiac pacing	Heart failure	8
Atrioventricular block	6		Cardiac pacing	Pacemakers	7
Computed tomography	6		Cardiac resynchronization therapy	Remote monitoring	7
congestive heart failure	6		Cardiac resynchronization therapy	Cardiomyopathy	6
coronary sinus	6		cardiac resynchronization therapy	congestive heart failure	6
electrocardiography	6		Cardiac resynchronization therapy	coronary sinus	6
Septal flash	6		Heart failure	Left bundle branch block	6
Ventricular arrhythmia	6		Atrial fibrillation	Heart failure	5
Ablation	5		cardiac resynchronization therapy	dyssynchrony	5
narrow QRS	5		Cardiac resynchronization therapy	electrocardiography	5
optimization	5		Cardiac resynchronization therapy	Left bundle branch block	5
Prognosis	5		cardiac resynchronization therapy	narrow QRS	5
strain	5		Cardiac resynchronization therapy	optimization	5
Cardiac implantable electronic devices	4		Cardiac resynchronization therapy	Reverse remodeling	5
Cardiac magnetic resonance imaging	4		Catheter ablation	Implantable cardioverter defibrillator	5
Imaging	4		Atrial fibrillation	Catheter ablation	4
Mortality	4		Atrial fibrillation	Electrophysiology	4
Right ventricular pacing	4		Atrioventricular block	Pacemakers	4
Three-dimensional echocardiography	4		cardiac magnetic resonance	cardiac resynchronization therapy	4
antitachycardia pacing	3		Cardiac magnetic resonance imaging	cardiac resynchronization therapy	4
Aortic disease	3		Cardiac resynchronization therapy	Catheter ablation	4
Atrioventricular junction ablation	3		Cardiac resynchronization therapy	Defibrillator	4
Biomarkers	3		Cardiac resynchronization therapy	Electrophysiology	4
Cardiac dyssynchrony	3		Cardiac resynchronization therapy	septal flash	4
chronic heart failure	3		cardiac resynchronization therapy	Ventricular arrhythmia	4
Complications	3		cardiomyopathy	heart failure	4
Congenital heart disease	3		Computed tomography	Echocardiography	4
Contrast echocardiography	3		Defibrillator	Pacemakers	4
Device	3		electrocardiography	Heart failure	4
EHRA survey	3		electrophysiology	heart failure	4
Follow-up	3		Electrophysiology	Implantable cardioverter defibrillator	4
fusion	3		Heart failure	Remote monitoring	4
Heart transplantation	3		Heart failure	Septal flash	4
Hypertrophic obstructive cardiomyopathy	3		Ablation	Arrhythmia	3
Intraventricular conduction disturbance	3		Ablation	Cardiac resynchronization therapy	3
Left ventricular dyssynchrony	3		Ablation	Electrophysiology	3
left ventricular ejection fraction	3		Aortic disease	Cardiac resynchronization therapy	3
left ventricular lead	3		Arrhythmia	Cardiac resynchronization therapy	3
left ventricular pacing	3		Arrhythmia	Heart failure	3
Mitral regurgitation	3		Arrhythmia	implantable cardioverter defibrillator	3
Myocardial deformation imaging	3		Arrhythmia	Pacemakers	3
Permanent cardiac pacing	3		Atrioventricular block	Intraventricular conduction disturbance	3
Remodelling	3		Atrioventricular block	Registry	3
Speckle-tracking	3		Atrioventricular junction ablation	Cardiac resynchronization therapy	3
Stress echocardiography	3		Biventricular pacing	Cardiac pacing	3
Survey	3		Biventricular pacing	Hypertrophic obstructive cardiomyopathy	3
Survival	3		Cardiac dyssynchrony	Cardiac resynchronization therapy	3
Telemedicine	3		Cardiac implantable electronic devices	Cardiac resynchronization therapy	3
Ventricular tachycardia	3		Cardiac magnetic resonance	Computed tomography	3
			Cardiac magnetic resonance	Echocardiography	3
			Cardiac magnetic resonance	Stress echocardiography	3
			Cardiac pacing	Implantable cardioverter defibrillator	3
			Cardiac resynchronization therapy	chronic heart failure	3
			Cardiac resynchronization therapy	Computed tomography	3
			Cardiac resynchronization therapy	Contrast echocardiography	3
			Cardiac resynchronization therapy	Device	3
			Cardiac resynchronization therapy	EHRA survey	3
			Cardiac resynchronization therapy	left ventricular lead	3
			Cardiac resynchronization therapy	left ventricular pacing	3
			Cardiac resynchronization therapy	Mortality	3
			Cardiac resynchronization therapy	Prognosis	3
			Cardiac resynchronization therapy	Right ventricular pacing	3
			cardiac resynchronization therapy	strain	3
			Cardiac resynchronization therapy	Survey	3
			Cardiac resynchronization therapy	Three-dimensional echocardiography	3
			Catheter ablation	Electrophysiology	3
			Computed tomography	Contrast echocardiography	3
			Computed tomography	Heart failure	3
			Congenital heart disease	Heart failure	3
			coronary sinus	heart failure	3
			Defibrillator	Heart failure	3
			dyssynchrony	echocardiography	3
			dyssynchrony	heart failure	3
			Echocardiography	Electrophysiology	3
			Echocardiography	Pacemakers	3
			Heart failure	Heart transplantation	3
			Heart failure	left ventricular ejection fraction	3
			Heart failure	Reverse remodeling	3
			Heart failure	Right ventricular pacing	3
			Heart failure	Three-dimensional echocardiography	3
			Intraventricular conduction disturbance	pacemakers	3
			Intraventricular conduction disturbance	Registry	3
			Pacemakers	Permanent cardiac pacing	3
			Permanent cardiac pacing	Registry	3

## Sheet: DES
Keywords	Trabajos		Keyword 1	Keyword 2	Colaboración
drug-eluting stents	176		drug-eluting stents	percutaneous coronary intervention	37
stent	96		percutaneous coronary intervention	stent	23
percutaneous coronary intervention	83		Bare metal stent	drug-eluting stents	21
restenosis	38		coronary artery disease	drug-eluting stents	19
coronary artery disease	35		drug-eluting stents	restenosis	18
optical coherence tomography	35		drug-eluting stents	stent	17
everolimus-eluting stents	32		acute myocardial infarction	drug-eluting stents	16
stent thrombosis	31		Drug-eluting stents	Stent thrombosis	16
bioresorbable vascular scaffolds	30		Diabetes mellitus	Drug-eluting stents	15
Bare metal stent	28		drug-eluting balloon	drug-eluting stents	15
acute myocardial infarction	27		drug-eluting stents	in-stent restenosis	15
angioplasty	27		drug-eluting stents	optical coherence tomography	14
Diabetes mellitus	25		angioplasty	Drug-eluting stents	12
intravascular ultrasound	24		coronary artery disease	percutaneous coronary intervention	12
drug-eluting balloon	23		drug-eluting balloon	in-stent restenosis	12
thrombosis	23		drug-eluting stents	everolimus-eluting stents	12
in-stent restenosis	18		drug-eluting stents	paclitaxel	12
sirolimus-eluting stents	18		restenosis	stent	12
Acute coronary syndrome	16		stent	thrombosis	12
Bifurcation lesions	16		drug-eluting stents	intravascular ultrasound	11
coronary artery bypass graft	16		Bifurcation lesions	drug-eluting stents	10
ST-elevation myocardial infarction	16		coronary angioplasty	stent	10
coronary angioplasty	14		bioresorbable vascular scaffolds	drug-eluting stents	9
paclitaxel	14		cardiac catheterization	stent	9
Left main coronary artery disease	13		drug-eluting stents	sirolimus	9
angiography	12		drug-eluting stents	ST-elevation myocardial infarction	9
cardiac catheterization	11		percutaneous coronary intervention	stent thrombosis	9
Chronic total coronary occlusion	11		bioresorbable vascular scaffolds	optical coherence tomography	8
revascularization	11		intravascular ultrasound	optical coherence tomography	8
sirolimus	11		Acute coronary syndrome	Percutaneous coronary intervention	7
randomised controlled trial	10		Acute myocardial infarction	stent	7
registry	10		Bare metal stent	percutaneous coronary intervention	7
Antiplatelet therapy	9		Cardiac catheterization	Registry	7
clinical trials	9		coronary artery bypass graft	percutaneous coronary intervention	7
coronary restenosis	9		Coronary artery disease	Stent	7
meta-analysis	9		Diabetes mellitus	restenosis	7
ST-segment elevation myocardial infarction	9		drug-eluting stents	Left main coronary artery disease	7
Outcome	8		drug-eluting stents	Percutaneous noncoronary intervention	7
biodegradable polymer	7		intravascular ultrasound	percutaneous coronary intervention	7
Percutaneous noncoronary intervention	7		percutaneous coronary intervention	Percutaneous noncoronary intervention	7
Quantitative coronary angiography	7		Percutaneous noncoronary intervention	stent	7
atherosclerosis	6		registry	stent	7
Bleeding	6		acute myocardial infarction	percutaneous coronary intervention	6
coronary aneurysm	6		angiography	restenosis	6
coronary angiography	6		Antiplatelet therapy	drug-eluting stents	6
coronary bifurcation	6		coronary artery bypass graft	stent	6
dual antiplatelet therapy	6		Coronary artery disease	Restenosis	6
Endothelial progenitor cells	6		Drug-eluting stents	meta-analysis	6
prognosis	6		drug-eluting stents	randomised controlled trial	6
SYNTAX score	6		drug-eluting stents	ST-segment elevation myocardial infarction	6
ABSORB	5		meta-analysis	Stent	6
coronary disease	5		angiography	drug-eluting stents	5
dedicated bifurcation stent	5		Bare metal stent	sirolimus-eluting stents	5
multiple vessel disease	5		coronary angiography	stent	5
Unprotected left main coronary artery	5		coronary artery bypass graft	Drug-eluting stents	5
bioactive stents	4		coronary artery disease	optical coherence tomography	5
Clinical outcomes	4		coronary restenosis	Stent	5
complications	4		drug-eluting balloon	percutaneous coronary intervention	5
coronary	4		in-stent restenosis	optical coherence tomography	5
cost-effectiveness analysis	4		optical coherence tomography	stent thrombosis	5
fractional flow reserve	4		paclitaxel	sirolimus	5
Off-label indications	4		percutaneous coronary intervention	ST-segment elevation myocardial infarction	5
Stable angina	4		revascularization	stent	5
treatment outcome	4		sirolimus-eluting stents	stent	5
Animal model	3		stent	stent thrombosis	5
Anticoagulation	3		acute coronary syndrome	everolimus-eluting stents	4
aspirin	3		angioplasty	sirolimus-eluting stents	4
cobalt-chromium stent	3		angioplasty	Stent	4
coronary stenosis	3		Bare metal stent	drug-eluting balloon	4
coronary vessels	3		Bare metal stent	in-stent restenosis	4
DES	3		bare metal stent	ST-elevation myocardial infarction	4
Elderly	3		Bare metal stent	Stent thrombosis	4
endothelium	3		Bifurcation lesions	Left main coronary artery disease	4
health registries	3		Bifurcation lesions	percutaneous coronary intervention	4
inflammation	3		biodegradable polymer	drug-eluting stents	4
interventional cardiology	3		Chronic total coronary occlusion	Drug-eluting stents	4
intracoronary imaging	3		Chronic total coronary occlusion	stent	4
Mortality	3		Clinical outcomes	Percutaneous coronary intervention	4
neoatherosclerosis	3		coronary angiography	coronary angioplasty	4
rapamycin	3		coronary artery bypass graft	Revascularization	4
risk factors	3		Coronary artery disease	drug-eluting balloon	4
target lesion revascularization	3		Diabetes mellitus	Percutaneous coronary intervention	4
Tranjscateter aortic valve implantation	3		drug-eluting balloon	everolimus-eluting stents	4
Transcatheter aortic valve implantation	3		drug-eluting balloon	restenosis	4
XIENCE	3		Drug-eluting stents	multiple vessel disease	4
zotarolimus	3		drug-eluting stents	Off-label indications	4
			drug-eluting stents	Quantitative coronary angiography	4
			Drug-eluting stents	Stable angina	4
			Endothelial progenitor cells	percutaneous coronary intervention	4
			everolimus-eluting stents	in-stent restenosis	4
			everolimus-eluting stents	percutaneous coronary intervention	4
			everolimus-eluting stents	randomised controlled trial	4
			intravascular ultrasound	stent thrombosis	4
			optical coherence tomography	percutaneous coronary intervention	4
			Optical coherence tomography	Stent	4
			paclitaxel	restenosis	4
			percutaneous coronary intervention	restenosis	4
			percutaneous coronary intervention	thrombosis	4
			restenosis	sirolimus-eluting stents	4
			ABSORB	bioresorbable vascular scaffolds	3
			acute coronary syndrome	Acute myocardial infarction	3
			Acute coronary syndrome	drug-eluting stents	3
			Acute coronary syndrome	Intravascular ultrasound	3
			acute coronary syndrome	outcome	3
			Acute coronary syndrome	stent	3
			Acute coronary syndrome	ST-segment elevation myocardial infarction	3
			Angiography	percutaneous coronary intervention	3
			Angioplasty	coronary artery bypass graft	3
			Angioplasty	coronary vessels	3
			Angioplasty	percutaneous coronary intervention	3
			angioplasty	restenosis	3
			angioplasty	ST-elevation myocardial infarction	3
			Bare metal stent	coronary artery bypass graft	3
			bioactive stents	outcome	3
			biodegradable polymer	everolimus-eluting stents	3
			bioresorbable vascular scaffolds	Coronary artery disease	3
			bioresorbable vascular scaffolds	percutaneous coronary intervention	3
			bioresorbable vascular scaffolds	ST-elevation myocardial infarction	3
			Bioresorbable vascular scaffolds	ST-segment elevation myocardial infarction	3
			bioresorbable vascular scaffolds	thrombosis	3
			cardiac catheterization	coronary angiography	3
			cardiac catheterization	coronary angioplasty	3
			cardiac catheterization	health registries	3
			Cardiac catheterization	Tranjscateter aortic valve implantation	3
			Cardiac catheterization	Transcatheter aortic valve implantation	3
			Chronic total coronary occlusion	Percutaneous coronary intervention	3
			clinical outcomes	endothelial progenitor cells	3
			clinical trials	Drug-eluting stents	3
			coronary	drug-eluting stents	3
			coronary angiography	health registries	3
			coronary angioplasty	drug-eluting stents	3
			coronary angioplasty	health registries	3
			coronary angioplasty	revascularization	3
			coronary artery bypass graft	diabetes mellitus	3
			coronary artery disease	intravascular ultrasound	3
			Coronary artery disease	Stent thrombosis	3
			Coronary artery disease	Thrombosis	3
			coronary disease	drug-eluting stents	3
			diabetes mellitus	revascularization	3
			Diabetes mellitus	sirolimus-eluting stents	3
			diabetes mellitus	stent	3
			drug-eluting balloon	optical coherence tomography	3
			drug-eluting stents	Fractional flow reserve	3
			drug-eluting stents	revascularization	3
			Drug-eluting stents	Unprotected left main coronary artery	3
			Endothelial progenitor cells	stent	3
			everolimus-eluting stents	outcome	3
			everolimus-eluting stents	Sirolimus	3
			everolimus-eluting stents	ST-elevation myocardial infarction	3
			everolimus-eluting stents	Stent thrombosis	3
			health registries	stent	3
			in-stent restenosis	intravascular ultrasound	3
			interventional cardiology	Stent	3
			intravascular ultrasound	stent	3
			Left main coronary artery disease	restenosis	3
			Left main coronary artery disease	stent	3
			Meta-analysis	Stent thrombosis	3
			Mortality	sirolimus-eluting stents	3
			Percutaneous coronary intervention	Revascularization	3
			percutaneous coronary intervention	SYNTAX score	3
			percutaneous coronary intervention	Unprotected left main coronary artery	3
			randomised controlled trial	sirolimus	3
			Registry	Tranjscateter aortic valve implantation	3
			Registry	Transcatheter aortic valve implantation	3
			restenosis	sirolimus	3
			sirolimus	stent	3
			Stent	Tranjscateter aortic valve implantation	3
			Stent	Transcatheter aortic valve implantation	3

## Sheet: microRNA
Keywords	Trabajos		Keyword 1	Keyword 2	Colaboración
microRNA	54		cardiovascular disease	microRNA	8
cardiovascular disease	11		Exosomes	microRNA	5
heart failure	9		heart failure	microRNA	5
biomarkers	8		biomarkers	microRNA	4
atrial fibrillation	6		Atherosclerosis	microRNA	3
Exosomes	6		Cardiovascular disease	Mediterranean diet	3
Genetics	5		cardiovascular disease	type 2 diabetes	3
inflammation	5		Exosomes	Extracellular vesicles	3
Atherosclerosis	4		Extracellular vesicles	microRNA	3
circulating microRNAs	4		fibrosis	microRNA	3
Myocardial fibrosis	4
Aortic valve stenosis	3
Cardiomyopathy	3
cholesterol efflux	3
Epigenetics	3
exercise	3
Extracellular vesicles	3
fibrosis	3
induced pluripotent stem cells	3
Mediterranean diet	3
miR-21	3
Mitochondria	3
obesity	3
polymorphism	3
Pressure overload	3
TGF-beta	3
type 2 diabetes	3

## Sheet: NOAC
Keywords	Trabajos		Keyword 1	Keyword 2	Colaboración
Atrial fibrillation	61		anticoagulation	atrial fibrillation	19
anticoagulation	24		Atrial fibrillation	Stroke	18
Stroke	18		Atrial Fibrillation	New oral anticoagulants	13
New oral anticoagulants	17		Atrial fibrillation	Vitamin K antagonists	13
anticoagulants	16		Atrial fibrillation	Non-vitamin K antagonist oral anticoagulants	12
non-vitamin K antagonist oral anticoagulants	15		anticoagulants	atrial fibrillation	11
Vitamin K antagonists	15		Non-vitamin K antagonist oral anticoagulants	Vitamin K antagonists	9
oral anticoagulants	14		Anticoagulation	Stroke	8
Dabigatran	13		Apixaban	Atrial fibrillation	8
Rivaroxaban	13		atrial fibrillation	dabigatran	8
apixaban	12		Atrial fibrillation	Oral anticoagulants	8
thromboembolism	10		atrial fibrillation	stroke prevention	7
Warfarin	10		Atrial fibrillation	Warfarin	7
bleeding	9		Apixaban	Warfarin	6
stroke prevention	9		Atrial fibrillation	rivaroxaban	6
Edoxaban	6		dabigatran	rivaroxaban	6
Antithrombotic therapy	5		Apixaban	dabigatran	5
Non-valvular atrial fibrillation	5		Apixaban	rivaroxaban	5
acute myocardial infarction	4		Atrial fibrillation	Bleeding	5
Biomarkers	4		dabigatran	new oral anticoagulants	5
dosing	4		Non-vitamin K antagonist oral anticoagulants	Stroke	5
EHRA survey	4		Stroke	Vitamin K antagonists	5
Factor Xa inhibitors	4		Anticoagulation	Dabigatran	4
Heart failure	4		anticoagulation	New oral anticoagulants	4
Registry	4		Anticoagulation	Rhythm control	4
Renal function	4		anticoagulation	thromboembolism	4
Rhythm control	4		anticoagulation	vitamin K antagonists	4
Ablation	3		Apixaban	new oral anticoagulants	4
acute coronary syndrome	3		Atrial fibrillation	Biomarkers	4
cardiovascular disease	3		atrial fibrillation	dosing	4
Cardioversion	3		atrial fibrillation	edoxaban	4
Catheter Ablation	3		Atrial fibrillation	Renal function	4
coagulation	3		Atrial fibrillation	Rhythm control	4
mechanical prosthetic heart valves	3		atrial fibrillation	thromboembolism	4
mortality	3		bleeding	oral anticoagulants	4
Rate control	3		Bleeding	Stroke	4
Surgery	3		dabigatran	warfarin	4
Transcatheter valve replacement	3		new oral anticoagulants	rivaroxaban	4
			New oral anticoagulants	vitamin K antagonists	4
			non-vitamin K antagonist oral anticoagulants	oral anticoagulants	4
			oral anticoagulants	stroke	4
			Ablation	Atrial fibrillation	3
			Ablation	Stroke	3
			anticoagulants	dosing	3
			Anticoagulation	Antithrombotic therapy	3
			Anticoagulation	Bleeding	3
			anticoagulation	edoxaban	3
			Anticoagulation	EHRA survey	3
			Anticoagulation	Non-vitamin K antagonist oral anticoagulants	3
			Anticoagulation	Rate control	3
			Anticoagulation	Registry	3
			anticoagulation	stroke prevention	3
			Antithrombotic therapy	Warfarin	3
			Atrial fibrillation	Cardioversion	3
			Atrial Fibrillation	Catheter Ablation	3
			Atrial fibrillation	EHRA survey	3
			Atrial fibrillation	Rate control	3
			dabigatran	edoxaban	3
			dabigatran	stroke	3
			Dosing	Renal function	3
			edoxaban	new oral anticoagulants	3
			edoxaban	rivaroxaban	3
			Heart failure	thromboembolism	3
			mechanical prosthetic heart valves	stroke prevention	3
			new oral anticoagulants	warfarin	3
			Oral anticoagulants	Stroke prevention	3
			Oral anticoagulants	Vitamin K antagonists	3
			Rate control	Rhythm control	3
			rivaroxaban	warfarin	3
			stroke	thromboembolism	3
			stroke prevention	vitamin K antagonists	3

## Sheet: Tako Tsubo
Keywords	Trabajos		Keyword 1	Keyword 2	Colaboración
Takotsubo cardiomyopathy	46		Takotsubo cardiomyopathy	transient left ventricular apical ballooning syndrome	13
transient left ventricular apical ballooning syndrome	19		acute myocardial infarction	Takotsubo cardiomyopathy	9
acute myocardial infarction	11		Stress induced cardiomyopathy	Takotsubo cardiomyopathy	8
Stress induced cardiomyopathy	11		Acute coronary syndrome	Takotsubo cardiomyopathy	6
acute coronary syndrome	8		Stress induced cardiomyopathy	transient left ventricular apical ballooning syndrome	6
cardiomyopathy	5		acute myocardial infarction	transient left ventricular apical ballooning syndrome	5
transient dyskinesia	5		Cardiomyopathy	Takotsubo cardiomyopathy	5
Cardiac magnetic resonance	4		Prognosis	Takotsubo cardiomyopathy	4
Prognosis	4		Takotsubo cardiomyopathy	transient dyskinesia	4
cardiac magnetic resonance imaging	3		Echocardiography	Takotsubo cardiomyopathy	3
Echocardiography	3		Epilepsy	Takotsubo cardiomyopathy	3
epilepsy	3
Heart failure	3

## Sheet: TAVI
Keywords	Trabajos		Keyword 1	Keyword 2	Colaboración
Transcatheter aortic valve implantation	170		aortic stenosis	Transcatheter aortic valve implantation	61
aortic stenosis	85		pacemaker	transcatheter aortic valve implantation	10
pacemaker	14		echocardiography	Transcatheter aortic valve implantation	9
aortic valve	12		Surgical aortic valve replacement	Transcatheter aortic valve implantation	9
echocardiography	12		Aortic regurgitation	Transcatheter aortic valve implantation	8
Three-dimensional echocardiography	11		Three-dimensional echocardiography	transcatheter aortic valve implantation	8
heart valve prosthesis implantation	10		Aortic stenosis	heart valve prosthesis implantation	7
Percutaneous coronary intervention	10		aortic valve	transcatheter aortic valve implantation	7
Aortic regurgitation	9		Registry	Transcatheter aortic valve implantation	7
Aortic valve replacement	9		stroke	Transcatheter aortic valve Implantation	7
stroke	9		Transcatheter aortic valve implantation	valve-in-valve	7
Surgical aortic valve replacement	9		Aortic stenosis	Aortic valve replacement	6
Coronary occlusion	8		Aortic valve replacement	Transcatheter aortic valve implantation	6
Registry	8		left bundle branch block	transcatheter aortic valve implantation	6
Cardiac catheterization	7		Mitral regurgitation	Transcatheter aortic valve implantation	6
prosthesis	7		Aortic stenosis	Pacemaker	5
Stent	7		aortic stenosis	prosthesis	5
valve-in-valve	7		Cardiac catheterization	Registry	5
Heart failure	6		Coronary occlusion	transcatheter aortic valve implantation	5
Infective endocarditis	6		Infective endocarditis	transcatheter aortic valve implantation	5
left bundle branch block	6		left bundle branch block	pacemaker	5
Mitral regurgitation	6		prognosis	transcatheter aortic valve implantation	5
bioprosthesis	5		prosthesis	Transcatheter aortic valve implantation	5
Complications	5		aortic stenosis	echocardiography	4
Paravalvular leak	5		Aortic stenosis	Prognosis	4
prognosis	5		aortic stenosis	stroke	4
transfemoral aortic valve implantation	5		Aortic stenosis	Surgical aortic valve replacement	4
Valvular heart disease	5		Aortic stenosis	Valvular heart disease	4
atrial fibrillation	4		Balloon aortic valvuloplasty	Transcatheter aortic valve implantation	4
Balloon aortic valvuloplasty	4		bioprosthesis	Transcatheter aortic valve implantation	4
Conduction disturbances	4		Cardiac catheterization	Stent	4
heart valves	4		Cardiac catheterization	Transcatheter aortic valve implantation	4
Mortality	4		Complications	transcatheter aortic valve implantation	4
percutaneous valve interventions	4		Conduction disturbances	Transcatheter aortic valve implantation	4
transesophageal echocardiography	4		heart failure	transcatheter aortic valve implantation	4
Valve disease	4		Registry	Stent	4
Atrioventricular block	3		Stent	Transcatheter aortic valve implantation	4
CoreValve	3		Aortic regurgitation	aortic stenosis	3
hemodynamics	3		Aortic stenosis	Complications	3
Magnetic resonance imaging	3		aortic stenosis	heart failure	3
Minimally invasive surgery	3		aortic stenosis	heart valves	3
Outcome	3		Aortic stenosis	Mitral regurgitation	3
paravalvular aortic regurgitation	3		Aortic stenosis	percutaneous valve interventions	3
Prosthesis-patient mismatch	3		aortic valve	pacemaker	3
surgery	3		atrial fibrillation	transcatheter aortic valve implantation	3
Transcatheter mitral repair	3		Conduction disturbances	Left bundle branch block	3
Transcatheter paravalvular leak closure	3		Conduction disturbances	Pacemaker	3
			Echocardiography	Transcatheter mitral repair	3
			Echocardiography	Transcatheter paravalvular leak closure	3
			Mortality	Transcatheter aortic valve implantation	3
			Outcome	Transcatheter aortic valve implantation	3
			paravalvular aortic regurgitation	Transcatheter aortic valve implantation	3
			Paravalvular leak	Transcatheter aortic valve implantation	3
			Prosthesis-patient mismatch	Transcatheter aortic valve implantation	3
			surgery	Transcatheter aortic valve implantation	3
			Transcatheter aortic valve implantation	Transcatheter mitral repair	3
			Transcatheter aortic valve implantation	Transcatheter paravalvular leak closure	3
			transcatheter aortic valve implantation	Valvular heart disease	3
			Transcatheter mitral repair	Transcatheter paravalvular leak closure	3

## Sheet: S-V
Keywords	Trabajos		Keyword 1	Keyword 2	Colaboración
heart failure	26		Heart failure	Neprilysin	13
Neprilysin	15		brain natriuretic peptide	Heart failure	5
LCZ696	9		Heart failure	Sacubitril	5
brain natriuretic peptide	8		Biomarkers	Heart failure	4
Prognosis	6		brain natriuretic peptide	Neprilysin	4
sacubitril/valsartan	6		heart failure	LCZ696	4
angiotensin receptor-neprilysin inhibitor	5		Heart failure	Prognosis	4
Sacubitril	5		heart failure	valsartan	4
valsartan	5		Neprilysin	Sacubitril	4
angiotensin receptor blockers	4		angiotensin receptor blockers	heart failure	3
Biomarkers	4		angiotensin receptor-neprilysin inhibitor	Heart failure	3
Acute heart failure	3		Biomarkers	Prognosis	3
PARADIGM-HF	3		heart failure	PARADIGM-HF	3
			heart failure	sacubitril/valsartan	3
			LCZ696	sacubitril	3
			LCZ696	valsartan	3
			neprilysin	valsartan	3
			sacubitril	valsartan	3
